# Supplementary material for: Synthesis of tetrazoles catalyzed by a new and recoverable nanocatalyst of cobalt on modified boehmite NPs with 1,3-bis(pyridin-3-ylmethyl)thiourea
Source: Royal Society of Chemistry journal article supplement (doi:10.1039/d2ra07510e), 2023-01-01

## Supplementary Data

### Synthesis of tetrazoles catalyzed by a new and recoverable nanocatalyst of cobalt on modified boehmite NPs with 1,3-bis(pyridin-3-ylmethyl)thiourea

Arida Jabbari<sup>\*a</sup>, Parisa Moradi<sup>b</sup>, Bahman Tahmasbi<sup>b</sup>

<sup>a</sup>*Department of Chemistry, Qeshm Branch, Islamic Azad University, Qeshm, Iran.*

<sup>b</sup>*Department of Chemistry, Faculty of Science, Ilam University, P.O. Box 69315516, Ilam, Iran.*

**Abstract:** At first part of this work, boehmite nanoparticles (BNPs) were synthesized from aqueous solutions of NaOH and Al(NO<sub>3</sub>)<sub>3</sub>.9H<sub>2</sub>O. Then, BNPs surface was modified using 3-chloropropyltrimoxysilane (CPTMS) and then 1,3-bis(pyridin-3-ylmethyl)thiourea ((PYT)<sub>2</sub>) was anchored on the surface of modified BNPs (CPTMS@BNPs). In the final step, a complex of cobalt stabilized on its surface (Co-(PYT)<sub>2</sub>@BNPs). The final obtained nanoparticles were characterized by FT-IR spectra, TGA analysis, SEM imaging, WDX analysis, EDS analysis, and XRD pattern. At second part, Co-(PYT)<sub>2</sub>@BNPs used as a highly efficient, retrievable, stable, and organic-inorganic hybrid nanocatalyst for homoselective formation of organic heterocyclic compounds such as tetrazole derivatives. The homoselectivity of Co-(PYT)<sub>2</sub>@BNPs was confirmed in the [3+2]cycloaddition of phthalonitrile and sodium azide (NaN<sub>3</sub>). Co-(PYT)<sub>2</sub>@BNPs as a novel nanocatalyst is stable and it has heterogeneity nature nanocatalyst; therefore, it can recovered and reused again for several consecutively runs without any re-activation.

**Keywords:** Boehmite nanoparticles; Heterogeneous catalyst; Homoselective nanocatalyst, Heterocyclic tetrazoles, Cobalt complex.

---

\* Address correspondence to A. Jabbari, Department of Chemistry, Qeshm Branch, Islamic Azad University, Qeshm, Iran. E-mail address: arida\_jabbari@yahoo.com

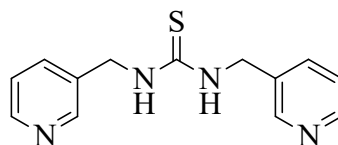

**3**

**1,3-bis(pyridin-3-ylmethyl)thiourea ((PYT)<sub>2</sub>):** <sup>1</sup>H NMR (400 MHz, DMSO-d<sub>6</sub>): δ<sub>H</sub>= 5.50 (s, 2H), 8.46-8.44 (d, *J*= 8 Hz, 2H), 8.22 (br, 2H), 7.69-7.66 (d, *J*= 12 Hz, 2H), 7.37-7.33 (d of d, *J*= 8 Hz, *J*= 4 Hz, 2H), 4.69 (s, 4H) ppm.

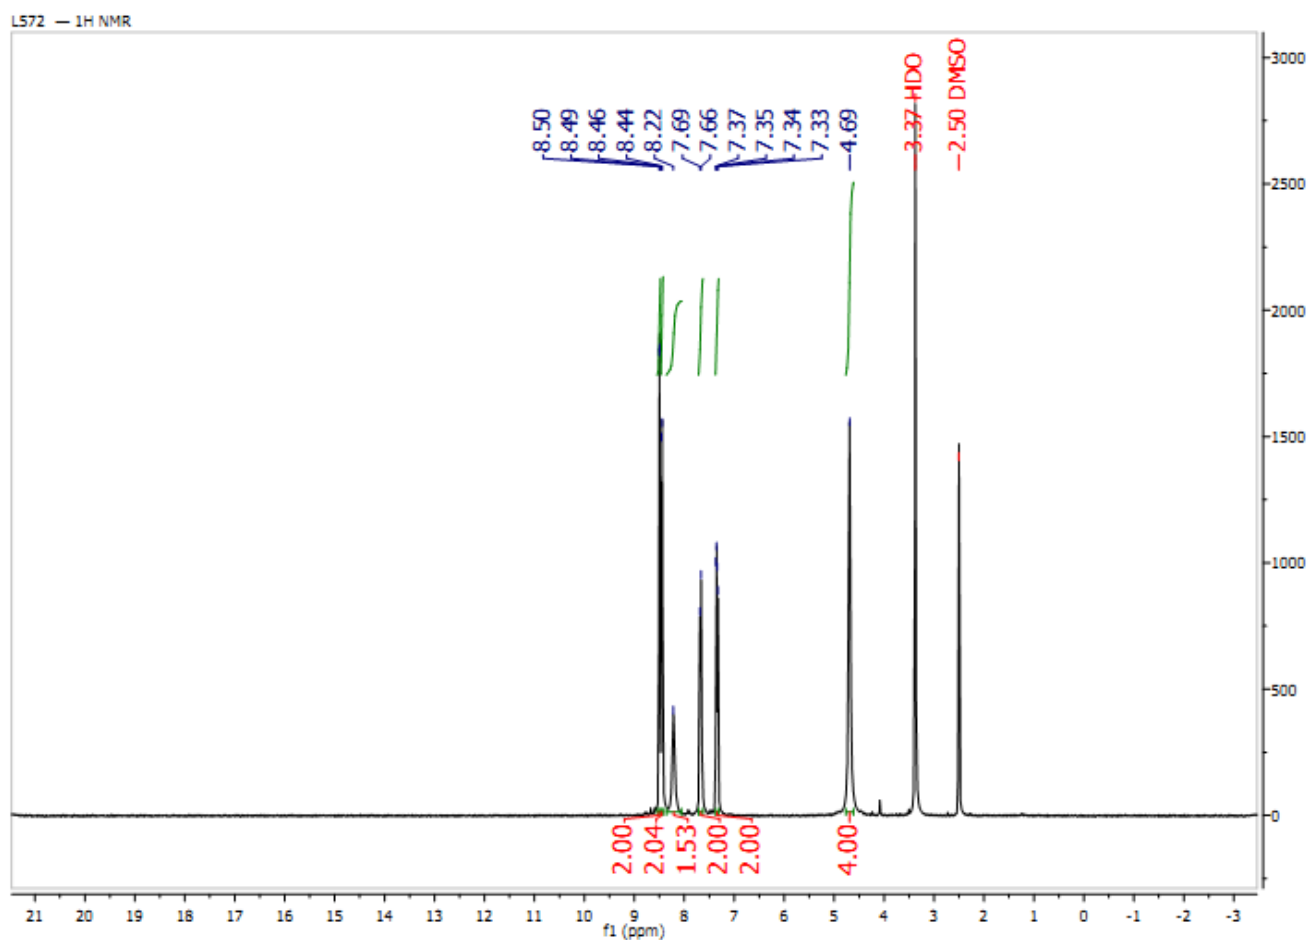

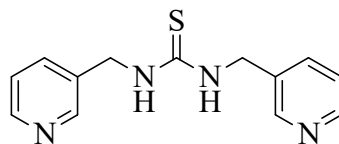

**3**

**1,3-bis(pyridin-3-ylmethyl)thiourea ((PYT)<sub>2</sub>):** <sup>1</sup>H NMR (400 MHz, DMSO-d<sub>6</sub>): δ<sub>H</sub> = 5.50 (s, 2H), 8.46-8.44 (d, *J* = 8 Hz, 2H), 8.22 (br, 2H), 7.69-7.66 (d, *J* = 12 Hz, 2H), 7.37-7.33 (d of d, *J* = 8 Hz, *J* = 4 Hz, 2H), 4.69 (s, 4H) ppm.

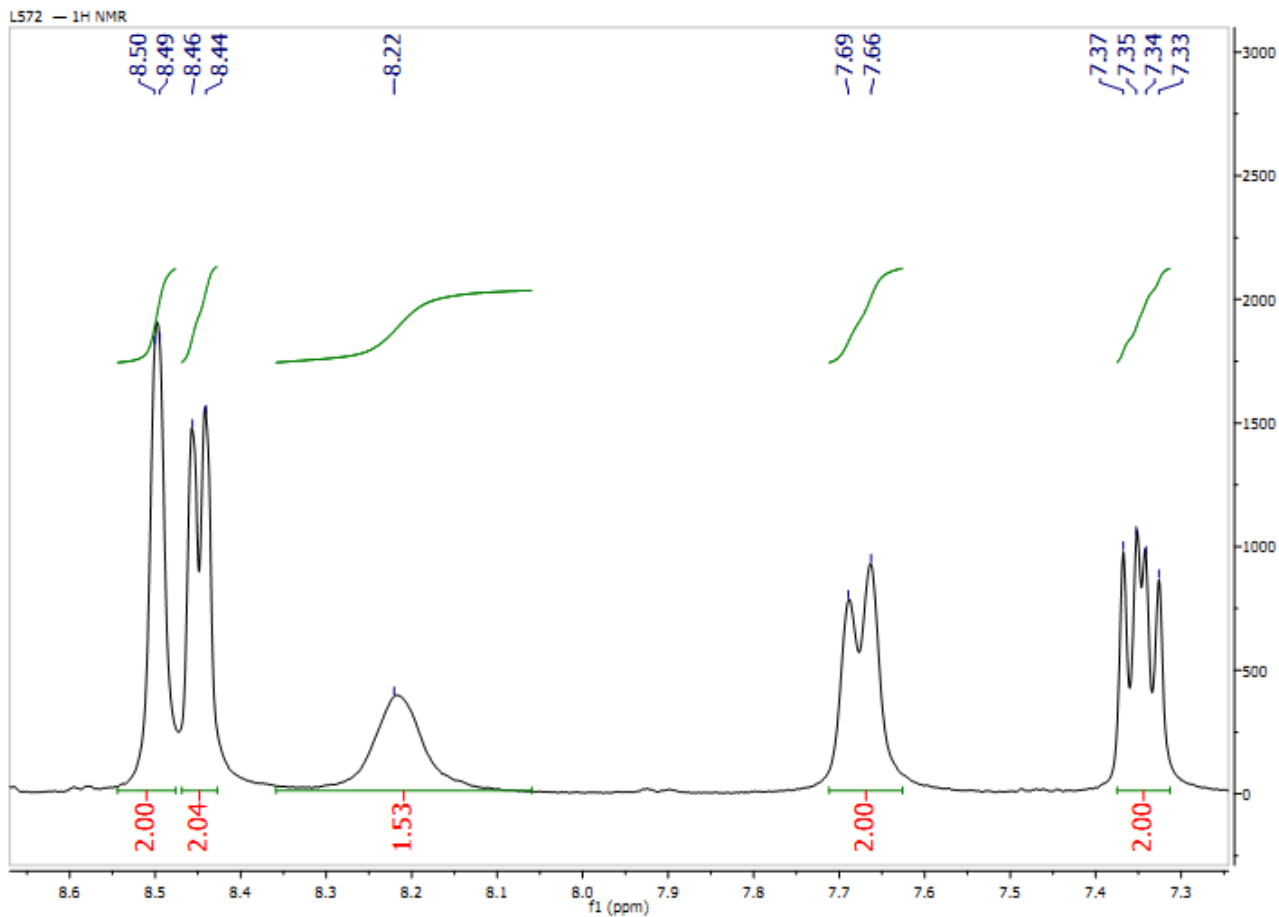



3

**1,3-bis(pyridin-3-ylmethyl)thiourea ((PYT)<sub>2</sub>):** IR (KBr) cm<sup>-1</sup>: 3272, 3184, 3000, 2923, 2853, 2359, 1913, 1529, 1473, 1422, 1298, 1237, 1193, 1101, 1027, 973, 918, 805, 770, 708, 616, 535.

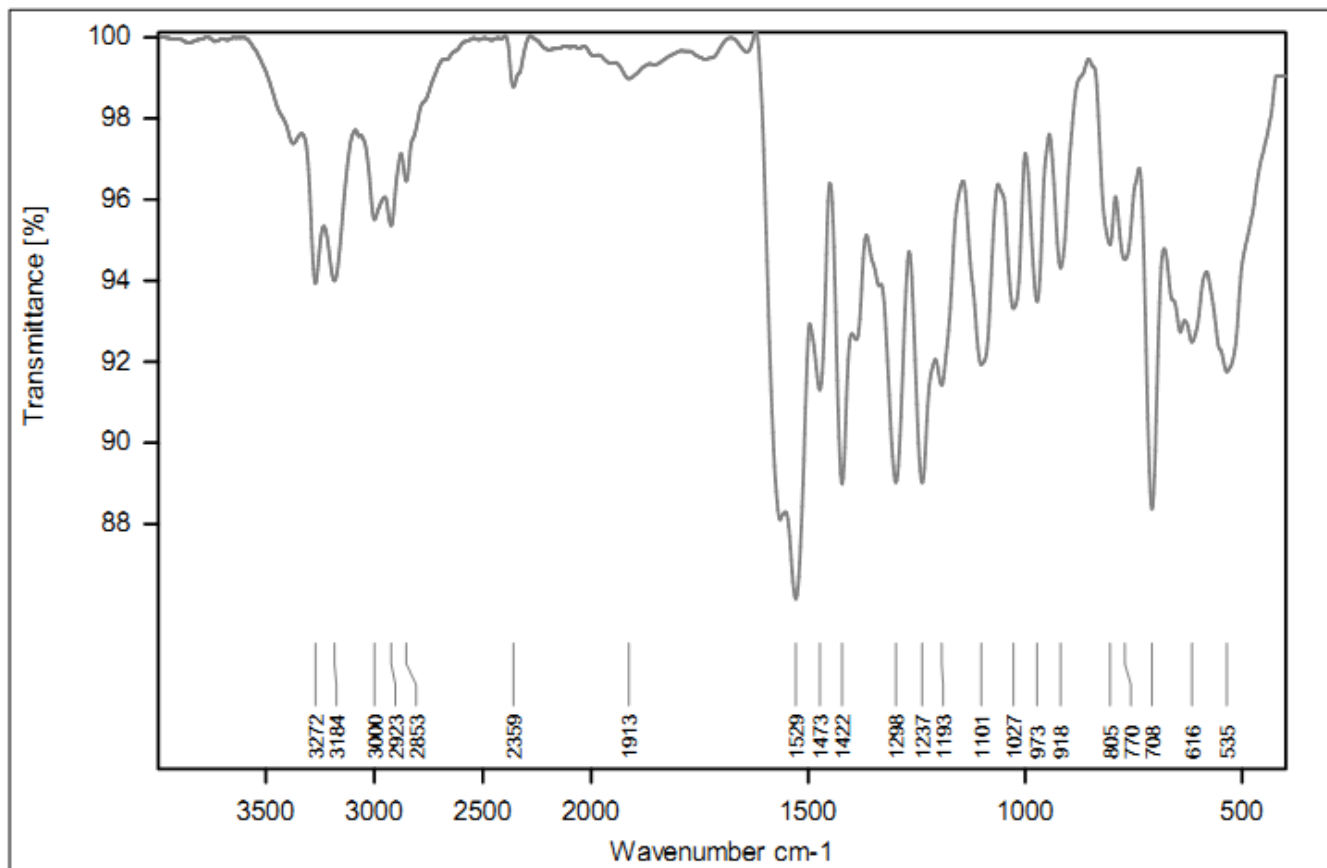

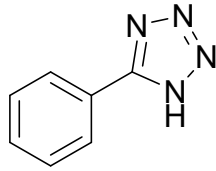

**5-phenyl-1H-tetrazole:**  $^1\text{H}$  NMR (400 MHz, DMSO- $d_6$ ):  $\delta_{\text{H}} = 16.89$  (br, 1H), 8.06-8.03 (d of d,  $J = 8$  Hz,  $J = 4$  Hz, 2H), 7.63-7.58 (m, 3H) ppm.

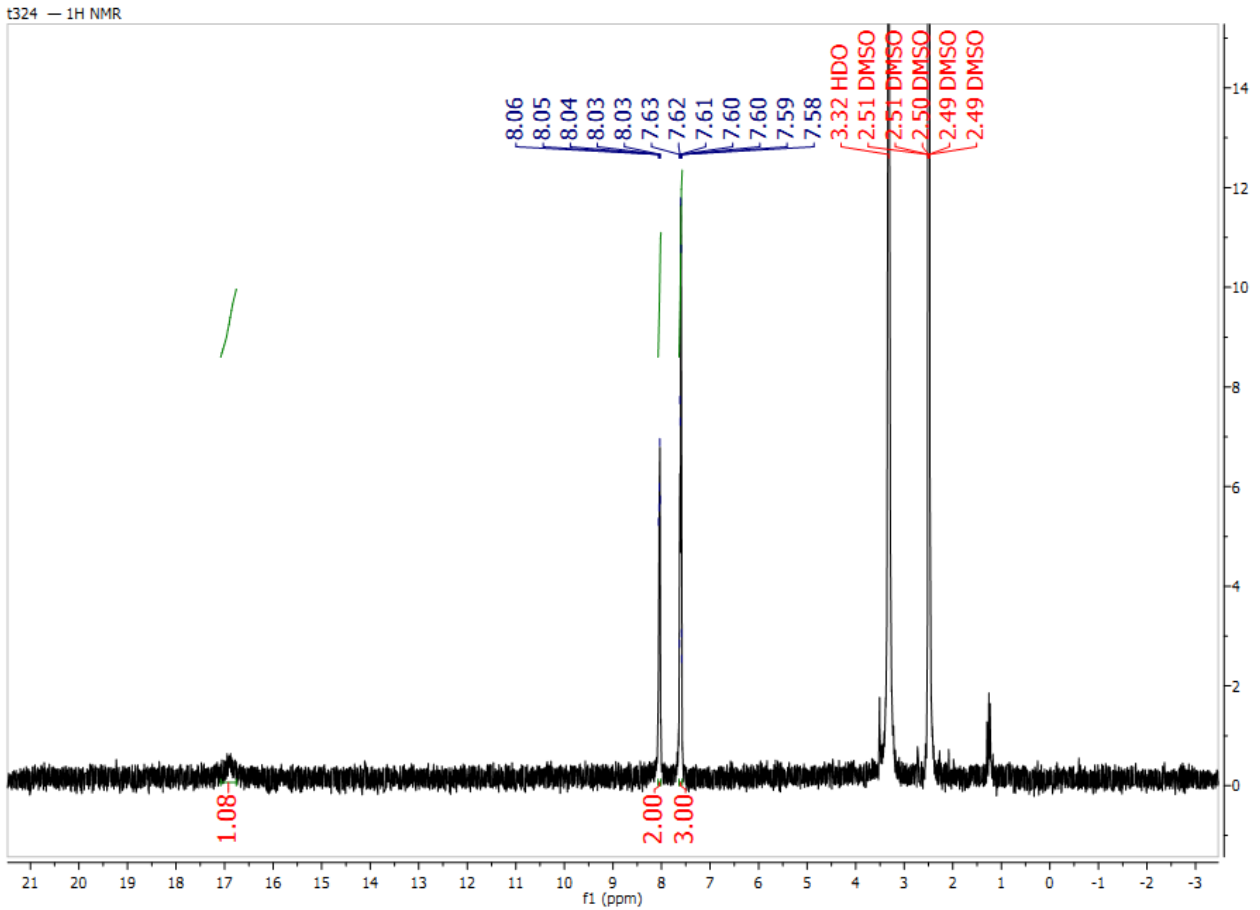

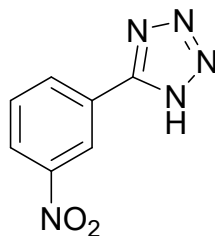

**5-(3-nitrophenyl)-1H-tetrazole:**  $^1\text{H}$  NMR (400 MHz, DMSO- $d_6$ ):  $\delta_{\text{H}} = 17.39$  (br, 1H), 8.85-8.84 (t,  $J = 4$  Hz, 1H), 8.85-8.84 (t,  $J = 4$  Hz, 1H), 8.50-8.47 (d of t,  $J = 12$  Hz,  $J = 4$  Hz, 1H), 8.45-8.41 (d of q,  $J(\text{d}) = 8$  Hz,  $J(\text{q}) = 4$  Hz, 1H), 7.94-7.89 (t,  $J = 12$  Hz, 1H) ppm.

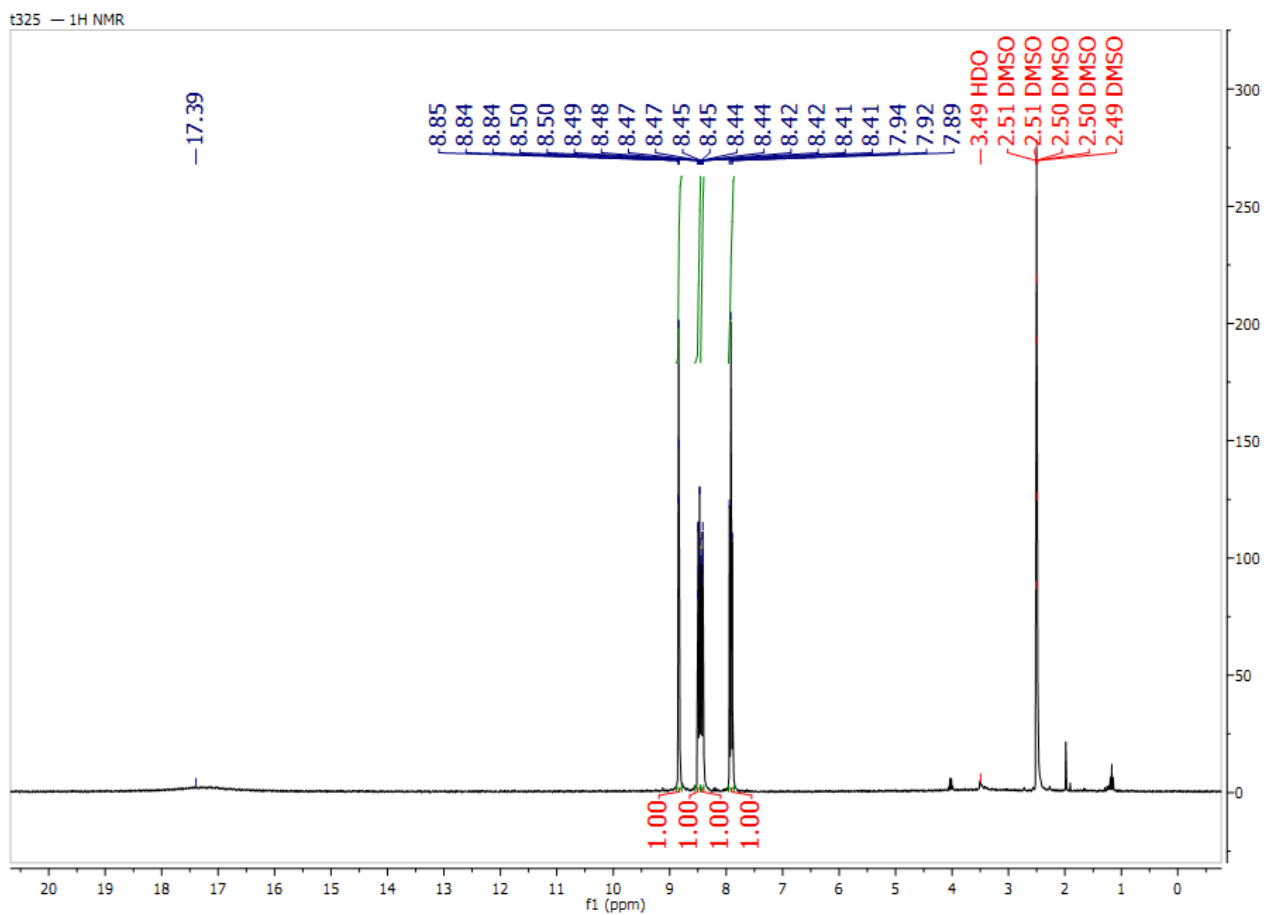

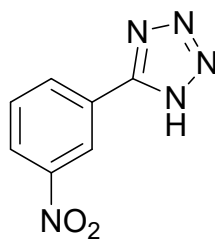

**5-(3-nitrophenyl)-1H-tetrazole:**  $^{13}\text{C}$  NMR (400 MHz, DMSO-d<sub>6</sub>):  $\delta_{\text{C}}$  = 153.9, 147.1, 131.9, 130.0, 125.2, 124.3, 120.3 ppm.

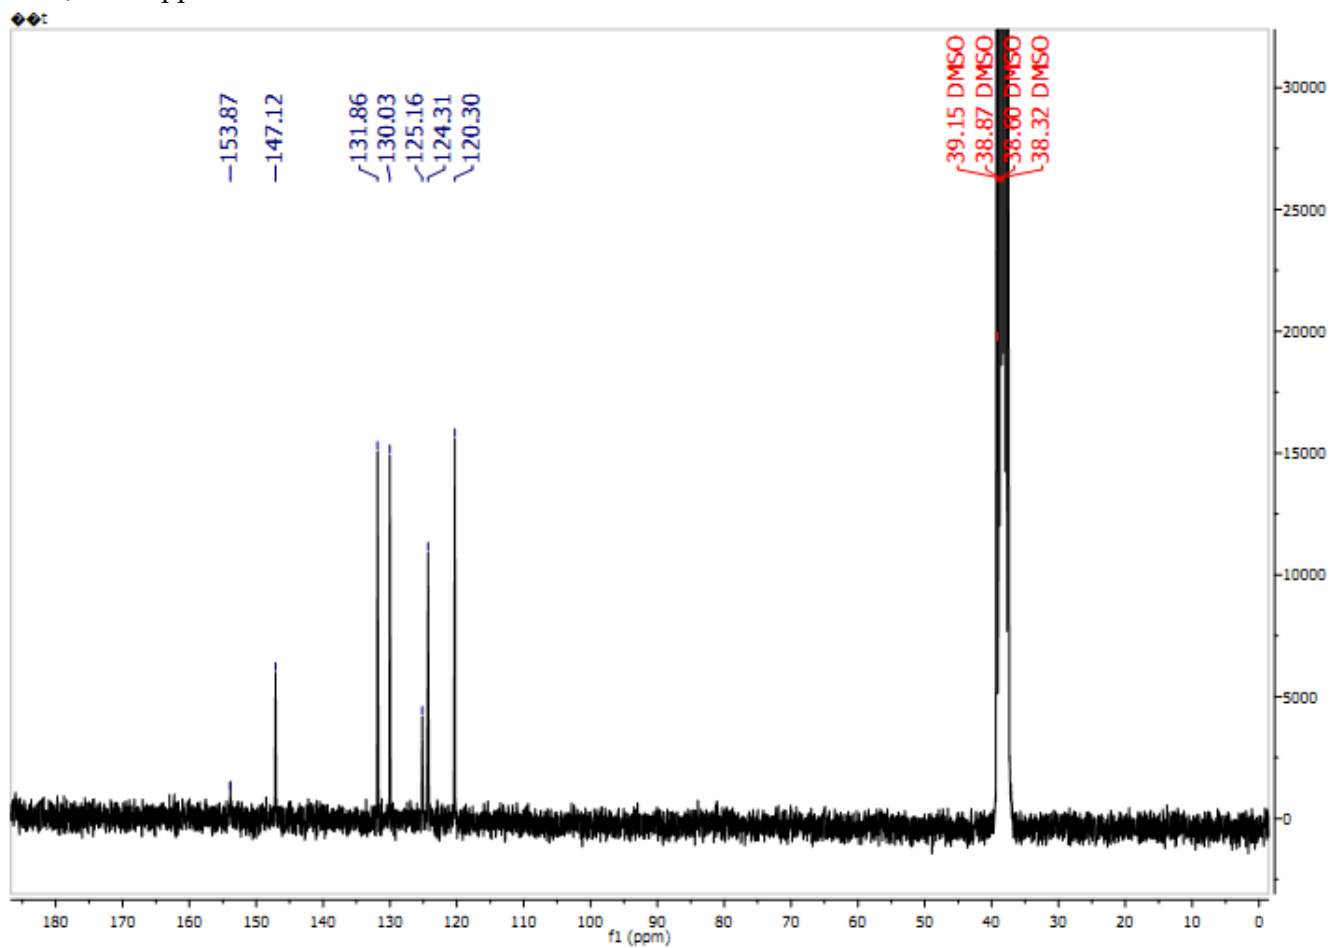



**5-(3-nitrophenyl)-1H-tetrazole:** IR (KBr)  $\text{cm}^{-1}$ : 3439, 3092, 2923, 2856, 2700, 1734, 1620, 1527, 1464, 1374, 1161, 1070, 991, 864, 816, 728, 665, 449.

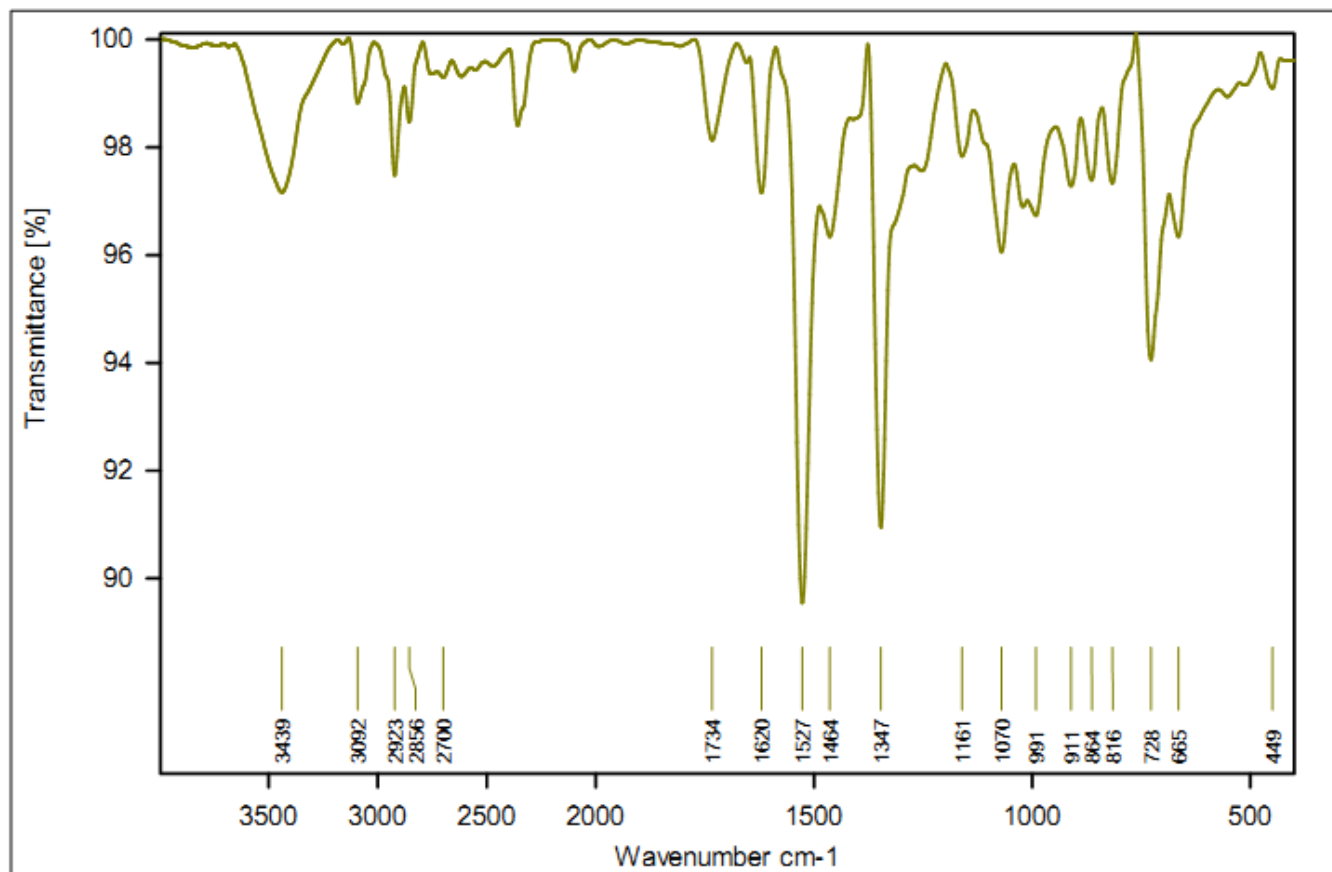



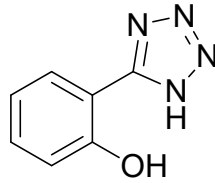

**2-(1H-tetrazol-5-yl)phenol:**  $^1\text{H}$  NMR (400 MHz, DMSO- $d_6$ ):  $\delta_{\text{H}} = 7.99\text{--}7.96$  (d of d,  $J = 12$  Hz,  $J = 4$  Hz, 1H),  $7.42\text{--}7.37$  (t of d,  $J = 12$  Hz, 1H),  $7.07\text{--}7.04$  (d,  $J = 12$  Hz, 1H),  $7.02\text{--}6.96$  (t,  $J = 12$  Hz, 1H) ppm.

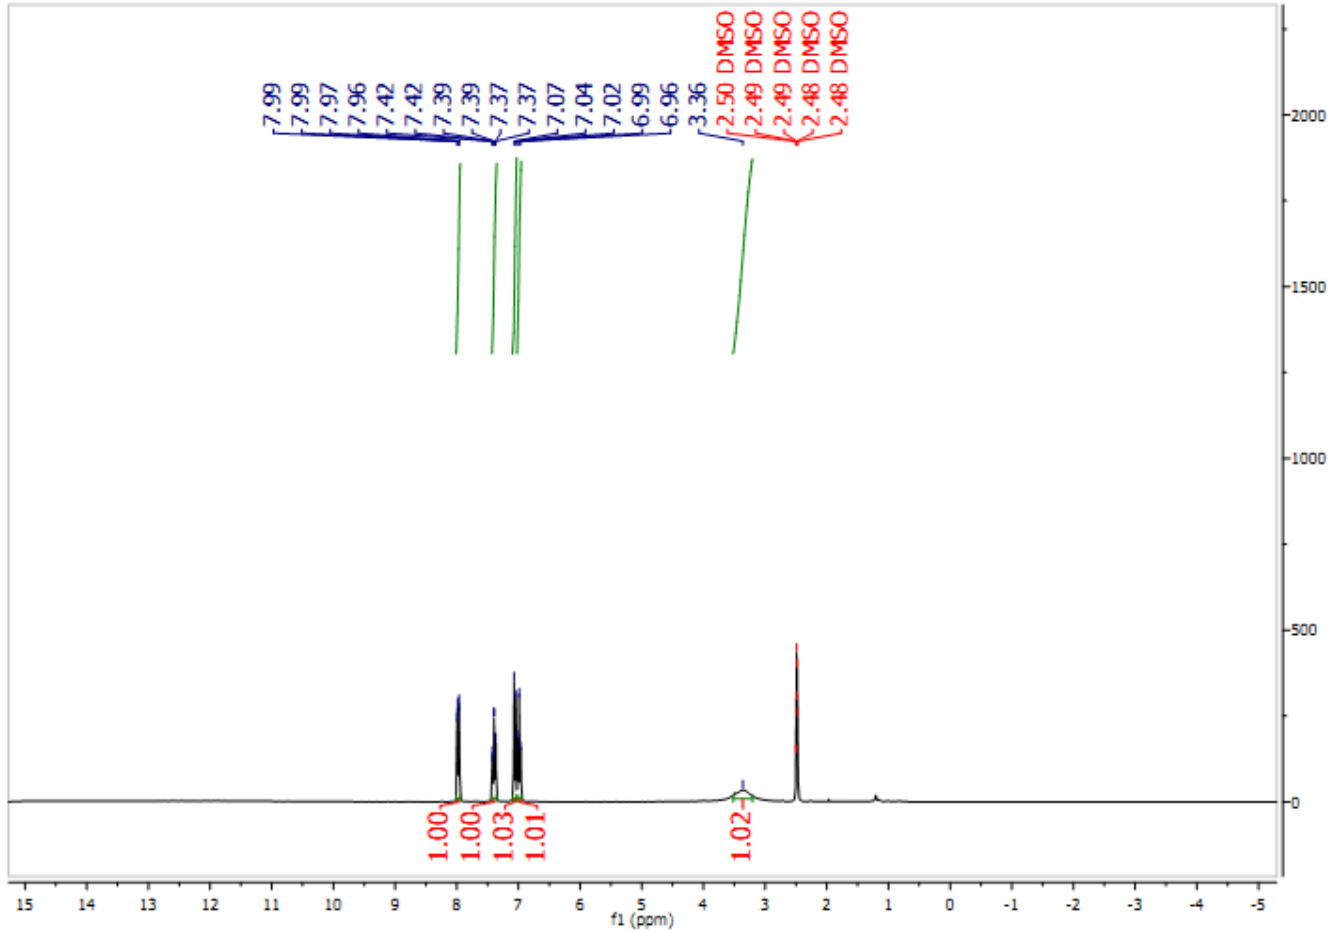

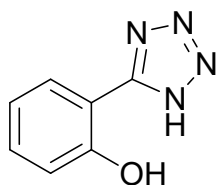

**2-(1H-tetrazol-5-yl)phenol:**  $^1\text{H}$  NMR (400 MHz, DMSO- $d_6$ ):  $\delta_{\text{H}} = 7.99\text{--}7.96$  (d of d,  $J = 12$  Hz,  $J = 4$  Hz, 1H),  $7.42\text{--}7.37$  (t of d,  $J = 12$  Hz, 1H),  $7.07\text{--}7.04$  (d,  $J = 12$  Hz, 1H),  $7.02\text{--}6.96$  (t,  $J = 12$  Hz, 1H) ppm.  $^{13}\text{C}$  NMR (400 MHz, DMSO- $d_6$ ):  $\delta_{\text{C}} = 155.3, 151.8, 132.5, 128.9, 119.7, 116.3, 110.6$  ppm.

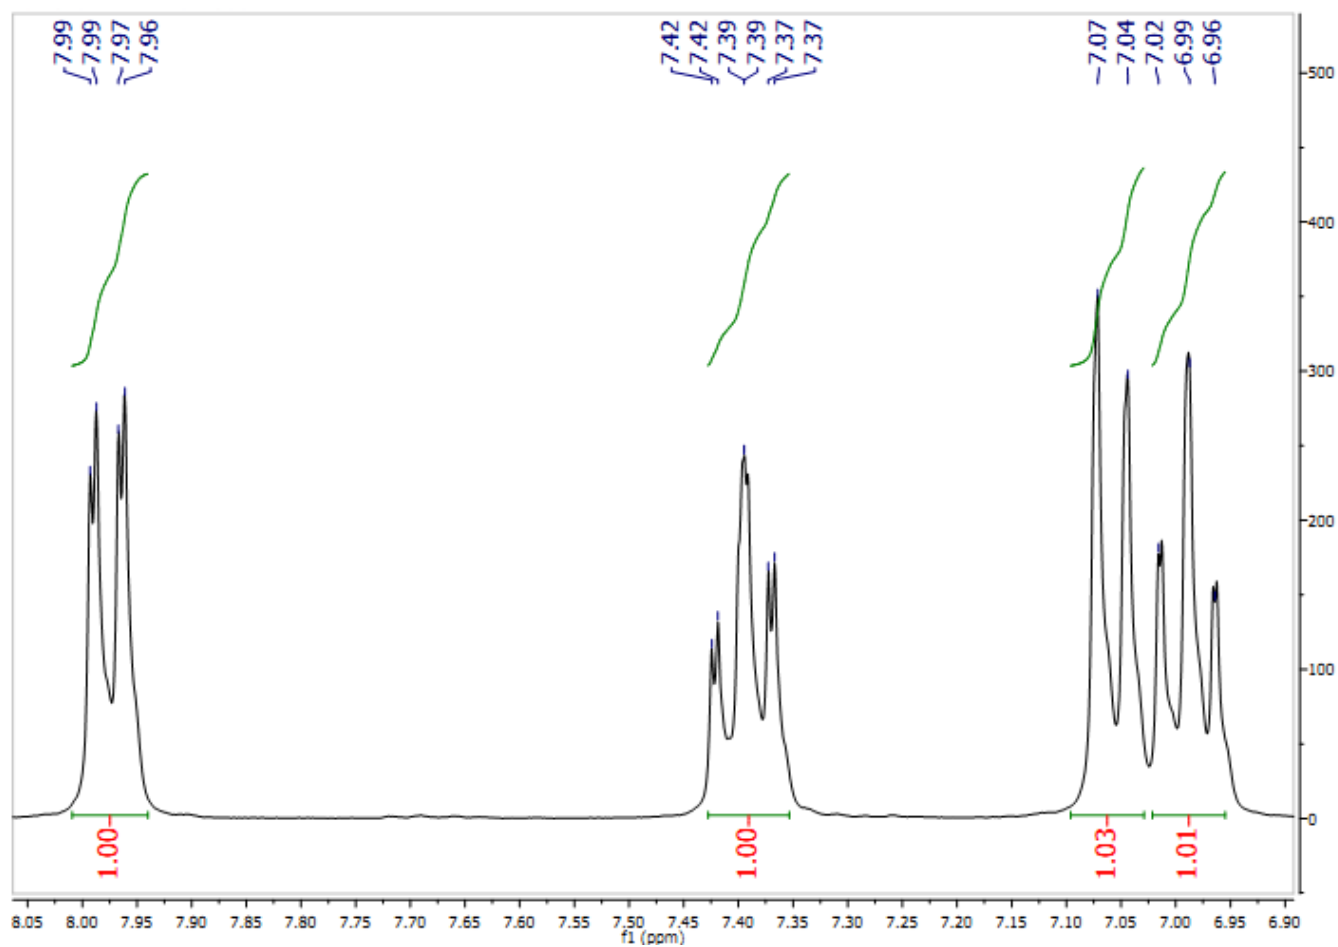

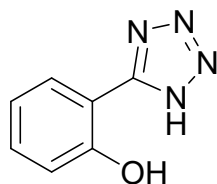

**2-(1H-tetrazol-5-yl)phenol:**  $^{13}\text{C}$  NMR (400 MHz, DMSO-d<sub>6</sub>):  $\delta_{\text{C}}$  = 155.3, 151.8, 132.5, 128.9, 119.7, 116.3, 110.6 ppm.

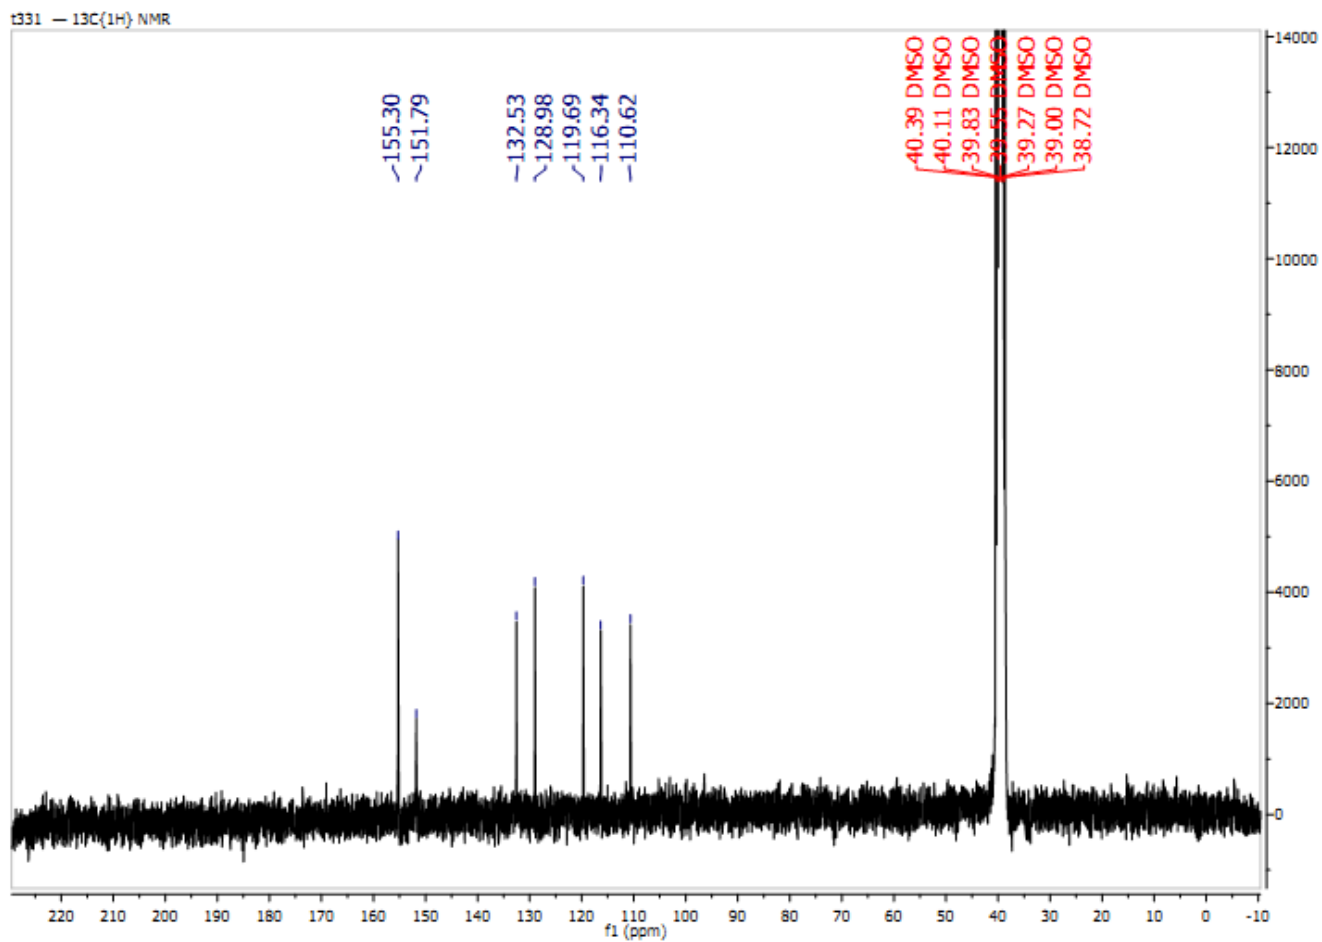

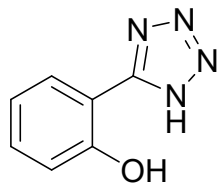

**2-(1H-tetrazol-5-yl)phenol:** IR (KBr)  $\text{cm}^{-1}$ : 3253, 3058, 2941, 2708, 2565, 1892, 1735, 1610, 1546, 1476, 1393, 1358, 1294, 1230, 1150, 1114, 1067, 808, 742, 681, 538, 465.

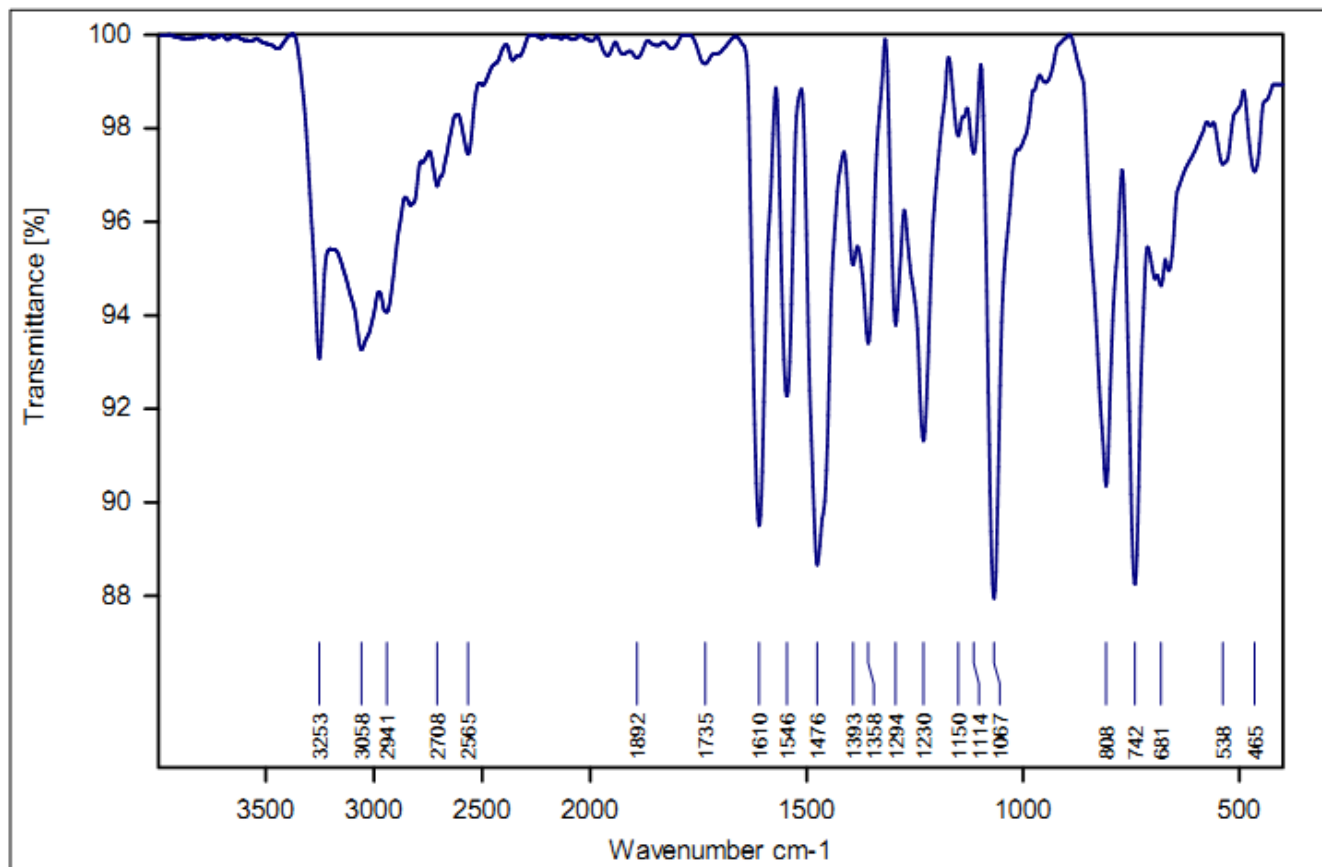

Supplement: d2ra07510e1.pdf [file d2ra07510e1.pdf]
